# Supplementary material for: Copper(ii) complexes of bis(aryl-imino)acenaphthene ligands: synthesis, structure, DFT studies and evaluation in reverse ATRP of styrene
Source: Royal Society of Chemistry journal article supplement (doi:10.1039/c4dt01069h), 2014-06-20
Supplement: c4dt01069h1.pdf [file c4dt01069h1.pdf]

*Electronic Supplementary Information for*

**Copper(II) Complexes of Bis(aryl-imino)acenaphthene  
Ligands: Synthesis, Structure, DFT Studies and Evaluation in  
Reverse ATRP of Styrene**

Christophe Fliedel,<sup>a</sup> Vitor Rosa,<sup>a</sup> Carla I. M. Santos,<sup>a</sup> Pablo J. Gonzalez,<sup>a</sup> Rui M. Almeida,<sup>a</sup> Clara S. B. Gomes,<sup>b</sup> Pedro T. Gomes,<sup>b,\*</sup> M. Amélia N. D. A. Lemos,<sup>c</sup> Gabriel Aullón,<sup>d,\*</sup> Richard Welter,<sup>e</sup> and Teresa Avilés<sup>a,\*</sup>

<sup>a</sup>*REQUIMTE, Departamento de Química, Faculdade de Ciências e Tecnologia, Universidade Nova de Lisboa, Caparica, 2829-516, Portugal*

<sup>b</sup>*Centro de Química Estrutural, Departamento de Engenharia Química, Instituto Superior Técnico, Universidade de Lisboa, Av. Rovisco Pais, 1049-001 Lisboa, Portugal*

<sup>c</sup>*IBB / CERENA, Instituto Superior Técnico, Universidade de Lisboa, Av. Rovisco Pais, 1049-001 Lisboa, Portugal*

<sup>d</sup>*Departament de Química Inorgànica and Institut de Química Teòrica i Computacional, Av. Diagonal 645, 08028 Barcelona, Spain.*

<sup>e</sup>*Institute of Plant Molecular Biology of CNRS UPR 2357, University of Strasbourg F-67084 Strasbourg, France*

\* Corresponding Authors. E-mails: [teresa.aviles@fct.unl.pt](mailto:teresa.aviles@fct.unl.pt), [gabriel.aullon@qi.ub.es](mailto:gabriel.aullon@qi.ub.es), [pedro.t.gomes@tecnico.ulisboa.pt](mailto:pedro.t.gomes@tecnico.ulisboa.pt)

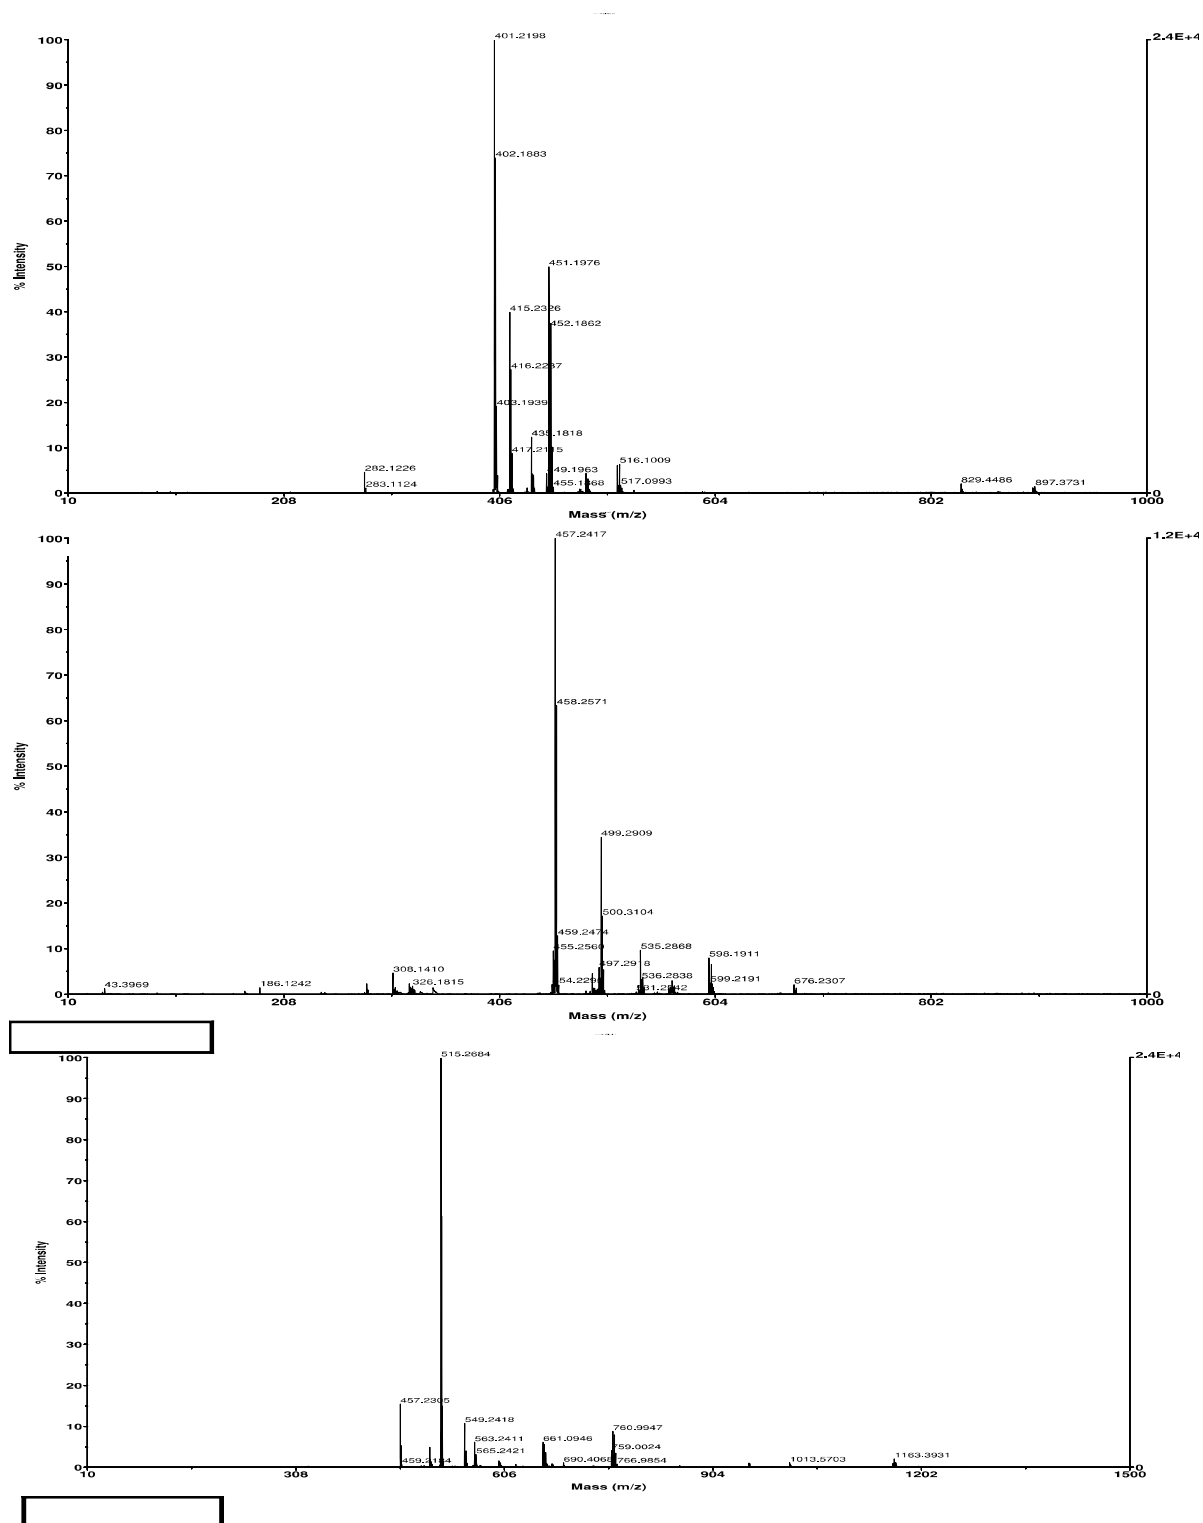

Figure S1. MALDI-TOF-MS spectra of complexes 1 (top), 2 (middle) and 3 (bottom).

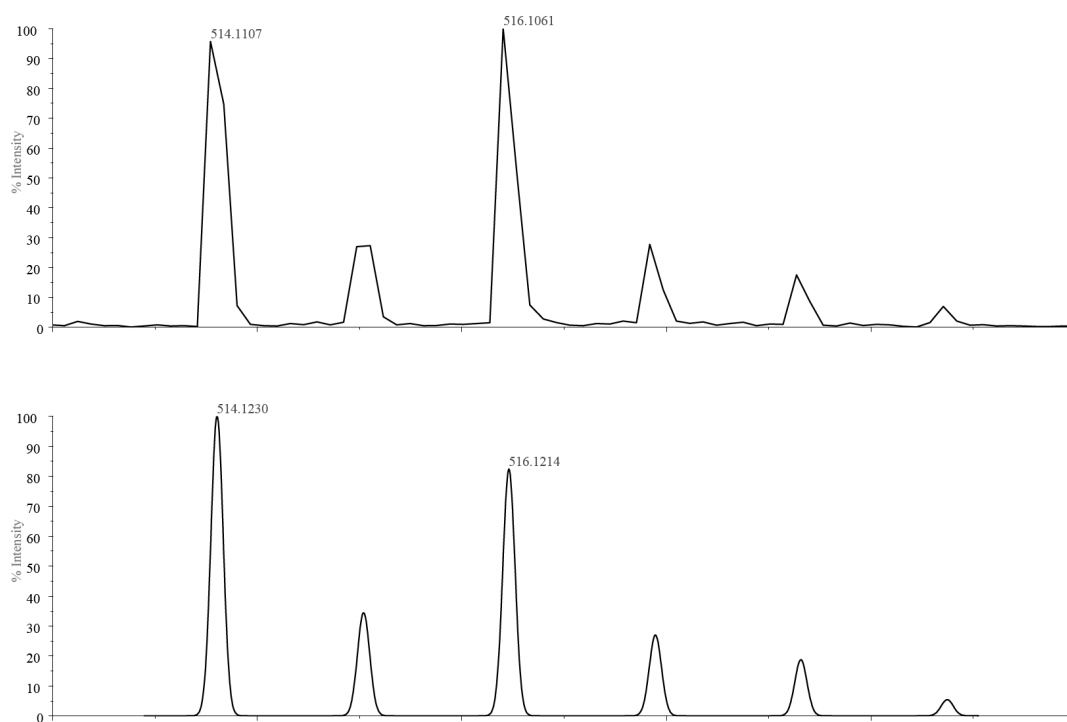

**Figure S2.** Experimental (top) and simulated (bottom) isotopic pattern of a MALDI-TOF-MS peak of complex **1**.

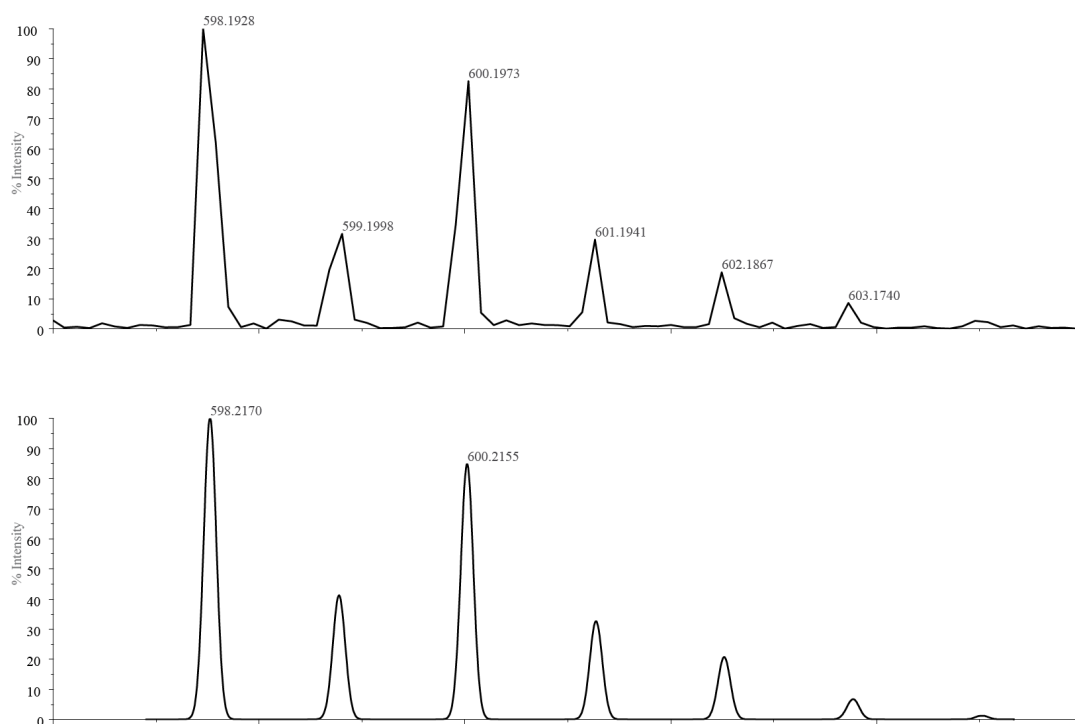

**Figure S3.** Experimental (top) and simulated (bottom) isotopic pattern of a MALDI-TOF-MS peak of complex **2**.

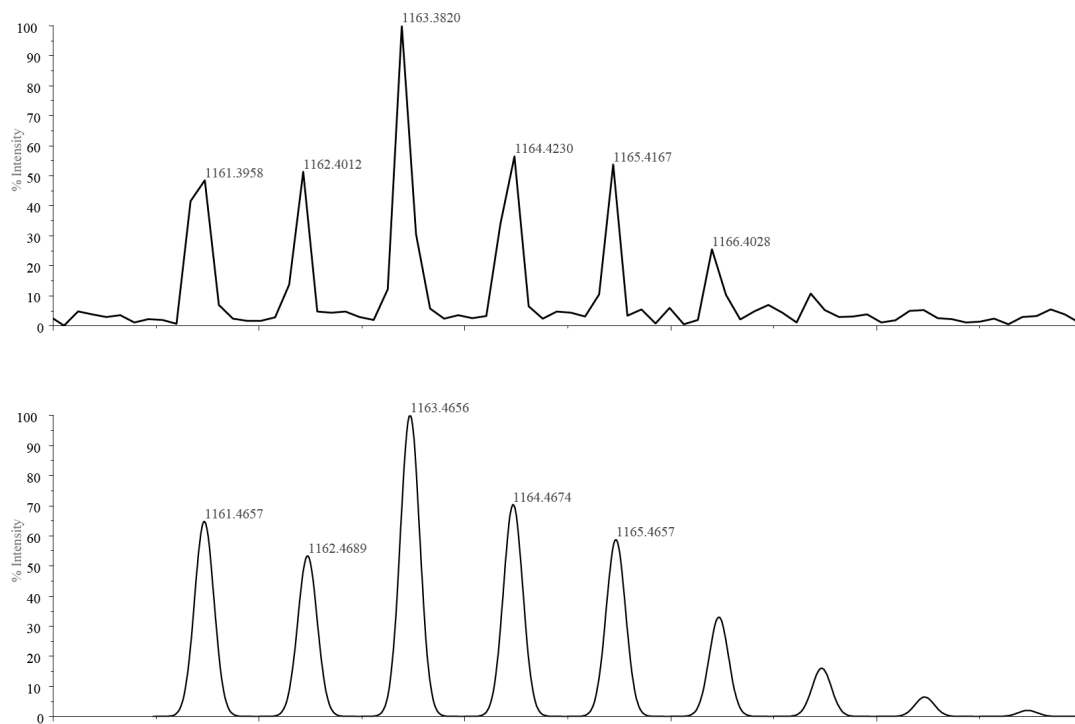

**Figure S4.** Experimental (top) and simulated (bottom) isotopic pattern of a MALDI-TOF-MS peak of complex **3**.

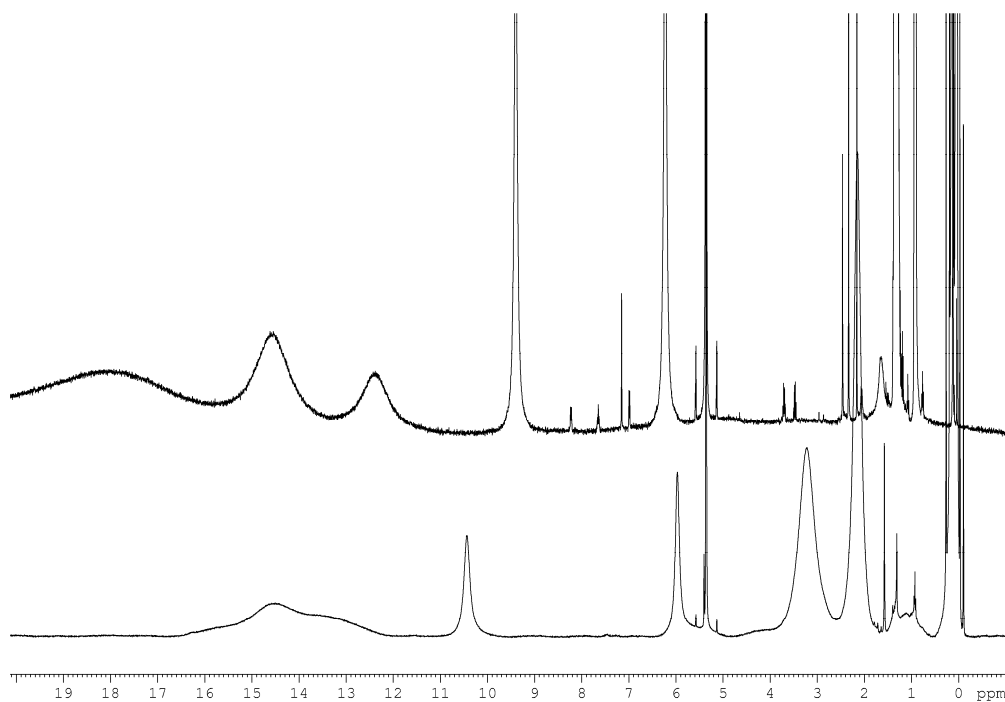

**Fig. S5** <sup>1</sup>H NMR spectra of **1** (top) and **2** (bottom) in CD<sub>2</sub>Cl<sub>2</sub>. Notice the broadened resonances in the region between 10 and 18 ppm. TMS peak resonances of the solution of complex and of the capillary, at *ca.* 0 ppm, were used to determine the molar magnetic susceptibilities (by the Evans method) and the numbers of unpaired electrons.

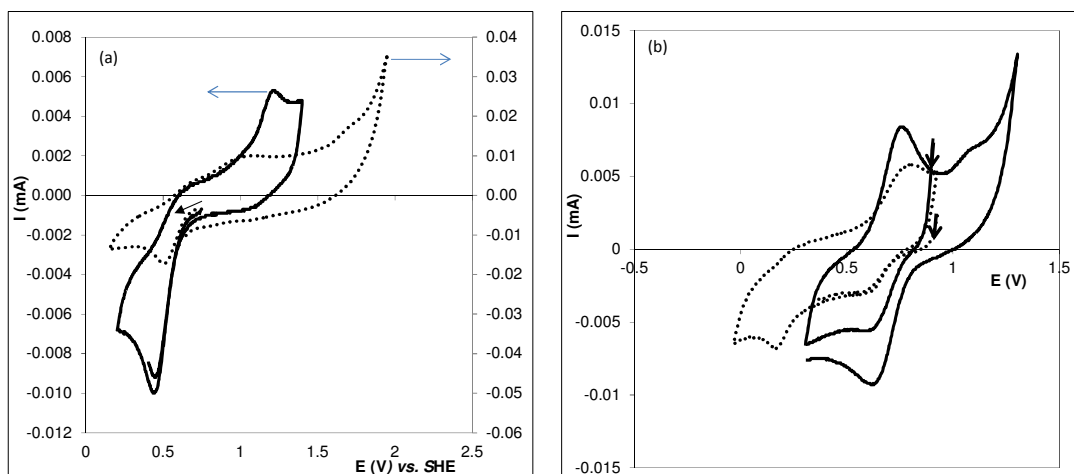

**Figure S6.** Cyclic voltammograms of **1** (dotted line) and **2** (solid line) in (a)  $\text{CH}_2\text{Cl}_2$  and in (b) MeOH at a Pt working electrode. Potentials measured vs. SHE, at a scan rate of 200 mV/s.

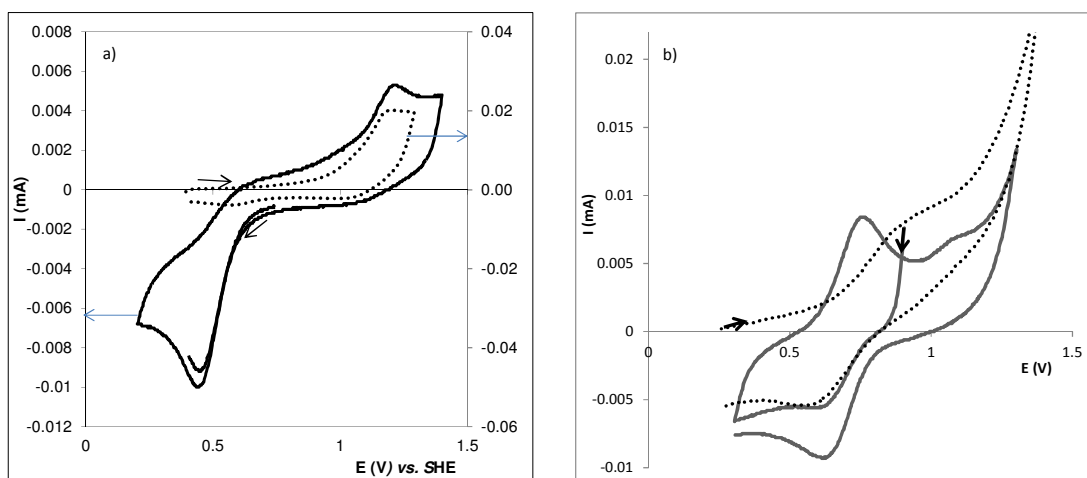

**Figure S7.** Cyclic voltammograms of **2** (solid line) and **3** (dotted line) in (a)  $\text{CH}_2\text{Cl}_2$  and (b) MeOH at a Pt working electrode. Potentials measured vs. SHE, at a scan rate of 200 mV/s.

**Table S1.** Variation of styrene conversion and  $M_n$  of the isolated polystyrenes (determined by GPC/SEC chromatography) with reaction time in the controlled radical polymerisation of styrene with complex **1**, and the corresponding  $M_n$  theoretical values. Reaction conditions:  $[\text{Styrene}]_0/[\text{Cu}]_0/[\text{AIBN}]_0 = 200/1/0.8$ , toluene (50% v/v), 80 °C.

| Entry | Time (h) | Conversion (%) | $M_n$ (GPC) (g/mol) | $M_n$ (theo) <sup>a</sup> (g/mol) | PDI  |
|-------|----------|----------------|---------------------|-----------------------------------|------|
| 0     | 0        | 0              | 0                   | 0                                 |      |
| 1     | 1.5      | 0.7            | 120                 | 182                               | 2.21 |
| 2     | 3.0      | 5.7            | 1050                | 1484                              | 2.30 |
| 3     | 6.0      | 11.0           | 2300                | 2864                              | 2.24 |
| 4     | 15.5     | 36.3           | 10500               | 9452                              | 2.28 |
| 5     | 21.5     | 51.2           | 14700               | 13331                             | 2.33 |
| 6     | 24.0     | 60.5           | 17800               | 15753                             | 2.36 |
| 7     | 45.0     | 80.7           | 22900               | 21012                             | 2.20 |

<sup>a</sup> calculated using the equation  $M_n(\text{theo}) = M_{\text{RU}} \times ([\text{Sty}]_0/[\text{AIBN}]_0) \times \text{conv.}$ , where  $M_{\text{RU}} = 104.15$  g/mol and  $[\text{Sty}]_0/[\text{AIBN}]_0 = 200/0.8 = 250$ .



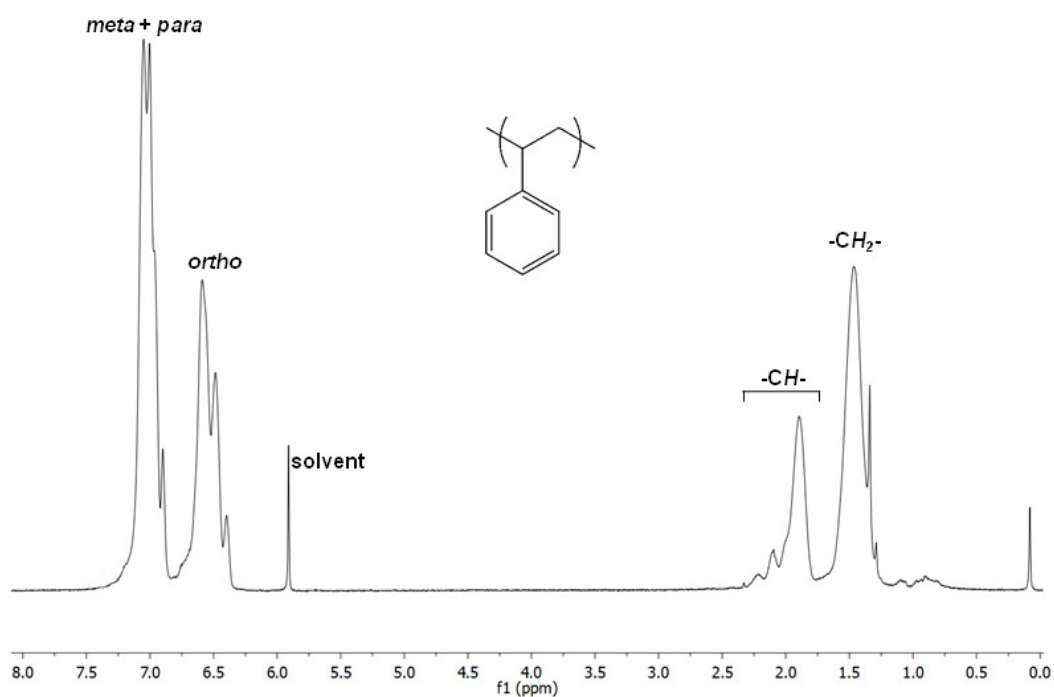

**Figure S8.**  $^1\text{H}$  NMR spectrum of the polystyrene of entry 7 (Table S1) (400 MHz,  $\text{CDCl}_2\text{CDCl}_2$ , 120 °C).

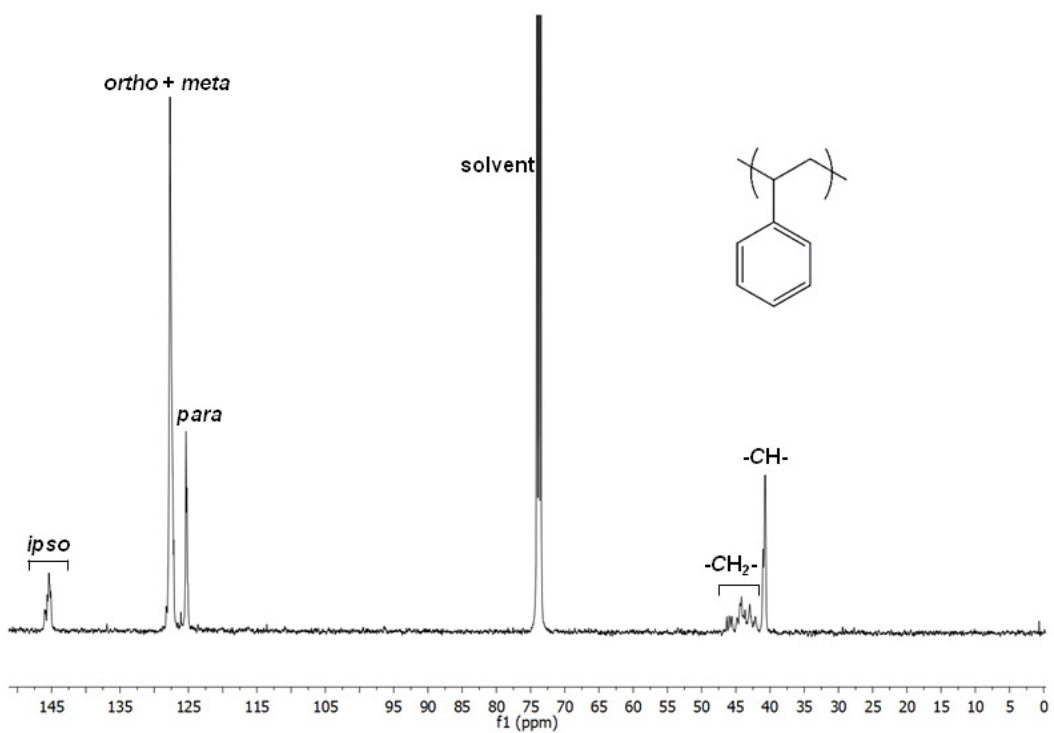

**Figure S9.**  $^{13}\text{C}\{^1\text{H}\}$  NMR spectrum of the polystyrene of entry 7 (Table S1) (100 MHz,  $\text{CDCl}_2\text{CDCl}_2$ , 120 °C).

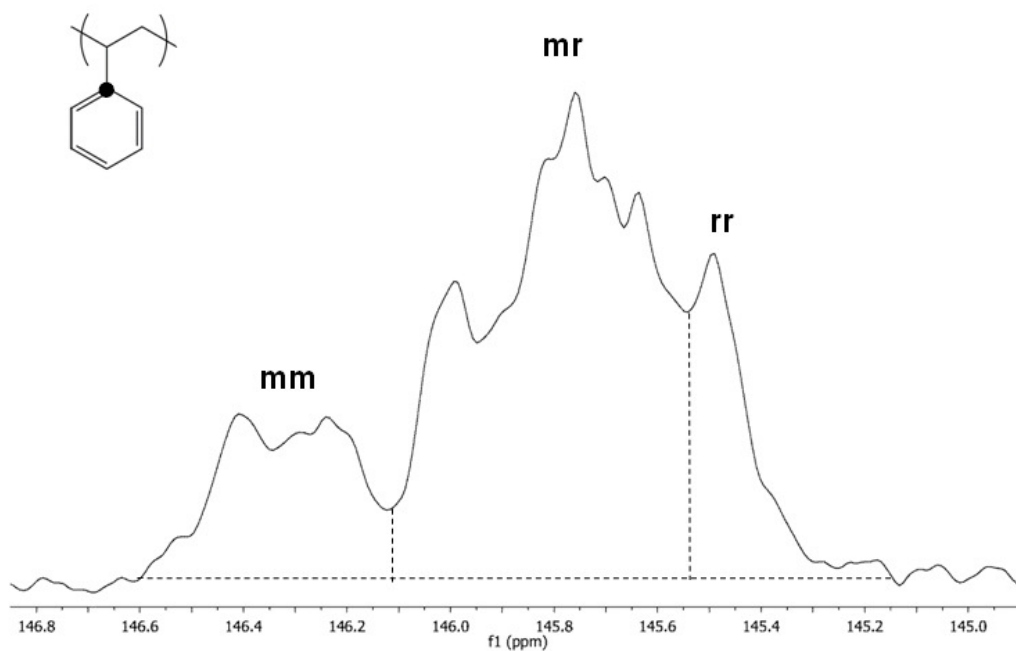

**Figure S10.**  $^{13}\text{C}\{^1\text{H}\}$  NMR spectrum of the aromatic *ipso* carbon region of the polystyrene of entry 7 (Table S1) (100 MHz,  $\text{CDCl}_2\text{CDCl}_2$ , 120 °C), and the corresponding assignment of triad sequences. The normalised triad intensities ( $mm = 0.16$ ,  $mr = 0.69$  and  $rr = 0.15$ ) reveal an atactic polymer ( $P_m = 0.50$ ).

**Table S2.** Coordinates for optimised geometries.**(a) [CuCl<sub>2</sub>(Ph-BIAN)]: tetracoordinated Cu(II)****[CuCl<sub>2</sub>(Ph-BIAN)]**

|    |            |           |           |
|----|------------|-----------|-----------|
| C  | -14.880814 | 23.854837 | 41.222350 |
| C  | -15.221879 | 24.457039 | 39.919211 |
| C  | -13.983044 | 24.733045 | 39.277721 |
| C  | -12.843673 | 24.379575 | 40.051467 |
| C  | -13.365284 | 23.840985 | 41.321407 |
| C  | -16.397862 | 24.806393 | 39.277586 |
| C  | -16.324645 | 25.410241 | 37.996614 |
| C  | -15.118855 | 25.646523 | 37.358749 |
| C  | -13.892412 | 25.306542 | 37.991420 |
| C  | -12.584111 | 25.484057 | 37.465070 |
| C  | -11.474967 | 25.108927 | 38.203961 |
| C  | -11.583697 | 24.560919 | 39.507267 |
| C  | -16.961432 | 23.282769 | 42.266212 |
| C  | -17.641358 | 23.797893 | 43.378223 |
| C  | -19.024864 | 23.662935 | 43.464571 |
| C  | -19.730553 | 22.976415 | 42.473178 |
| C  | -19.044386 | 22.421494 | 41.390022 |
| C  | -17.663084 | 22.573944 | 41.280249 |
| H  | -17.079687 | 24.295446 | 44.162343 |
| H  | -20.806719 | 22.854681 | 42.555613 |
| H  | -17.121335 | 22.119848 | 40.456241 |
| C  | -11.443796 | 23.341629 | 42.662164 |
| C  | -10.674606 | 24.513330 | 42.646728 |
| C  | -9.321119  | 24.454612 | 42.975863 |
| C  | -8.730205  | 23.234867 | 43.314559 |
| C  | -9.505664  | 22.073124 | 43.348108 |
| C  | -10.864227 | 22.124901 | 43.044951 |
| H  | -11.145905 | 25.462832 | 42.412413 |
| H  | -7.675906  | 23.193793 | 43.572365 |
| H  | -11.482509 | 21.234447 | 43.102096 |
| Cl | -15.500596 | 21.036568 | 44.590903 |
| Cl | -13.248013 | 23.525866 | 45.680470 |
| Cu | -14.285358 | 22.759541 | 43.847241 |
| H  | -17.365732 | 24.620548 | 39.726972 |
| H  | -17.250916 | 25.683089 | 37.499651 |
| H  | -15.105091 | 26.095255 | 36.368903 |
| H  | -12.458487 | 25.917291 | 36.476183 |
| H  | -10.483901 | 25.247586 | 37.782095 |
| H  | -10.686600 | 24.303625 | 40.057034 |
| H  | -19.548849 | 24.074815 | 44.321965 |
| H  | -19.582528 | 21.857200 | 40.633509 |
| H  | -8.731476  | 25.367071 | 42.979915 |
| H  | -9.057842  | 21.125554 | 43.632757 |
| N  | -15.552213 | 23.412057 | 42.227423 |
| N  | -12.835233 | 23.364294 | 42.392982 |

**[CuCl<sub>2</sub>(Mes-BIAN)]**

|   |            |           |           |
|---|------------|-----------|-----------|
| C | -14.880814 | 23.854837 | 41.222350 |
| C | -15.221879 | 24.457039 | 39.919211 |
| C | -13.983044 | 24.733045 | 39.277721 |
| C | -12.843673 | 24.379575 | 40.051467 |
| C | -13.365284 | 23.840985 | 41.321407 |
| C | -16.397862 | 24.806393 | 39.277586 |
| C | -16.324645 | 25.410241 | 37.996614 |
| C | -15.118855 | 25.646523 | 37.358749 |
| C | -13.892412 | 25.306542 | 37.991420 |

|    |            |           |           |
|----|------------|-----------|-----------|
| C  | -12.584111 | 25.484057 | 37.465070 |
| C  | -11.474967 | 25.108927 | 38.203961 |
| C  | -11.583697 | 24.560919 | 39.507267 |
| C  | -16.961432 | 23.282769 | 42.266212 |
| C  | -17.641358 | 23.797893 | 43.378223 |
| C  | -19.024864 | 23.662935 | 43.464571 |
| C  | -19.730553 | 22.976415 | 42.473178 |
| C  | -19.044386 | 22.421494 | 41.390022 |
| C  | -17.663084 | 22.573944 | 41.280249 |
| H  | -17.079687 | 24.295446 | 44.162343 |
| H  | -20.806719 | 22.854681 | 42.555613 |
| H  | -17.121335 | 22.119848 | 40.456241 |
| C  | -11.443796 | 23.341629 | 42.662164 |
| C  | -10.674606 | 24.513330 | 42.646728 |
| C  | -9.321119  | 24.454612 | 42.975863 |
| C  | -8.730205  | 23.234867 | 43.314559 |
| C  | -9.505664  | 22.073124 | 43.348108 |
| C  | -10.864227 | 22.124901 | 43.044951 |
| H  | -11.145905 | 25.462832 | 42.412413 |
| H  | -7.675906  | 23.193793 | 43.572365 |
| H  | -11.482509 | 21.234447 | 43.102096 |
| Cl | -15.500596 | 21.036568 | 44.590903 |
| Cl | -13.248013 | 23.525866 | 45.680470 |
| Cu | -14.285358 | 22.759541 | 43.847241 |
| H  | -17.365732 | 24.620548 | 39.726972 |
| H  | -17.250916 | 25.683089 | 37.499651 |
| H  | -15.105091 | 26.095255 | 36.368903 |
| H  | -12.458487 | 25.917291 | 36.476183 |
| H  | -10.483901 | 25.247586 | 37.782095 |
| H  | -10.686600 | 24.303625 | 40.057034 |
| H  | -19.548849 | 24.074815 | 44.321965 |
| H  | -19.582528 | 21.857200 | 40.633509 |
| H  | -8.731476  | 25.367071 | 42.979915 |
| H  | -9.057842  | 21.125554 | 43.632757 |
| N  | -15.552213 | 23.412057 | 42.227423 |
| N  | -12.835233 | 23.364294 | 42.392982 |

[CuCl<sub>2</sub>(Dipp-BIAN)]

|   |           |           |           |
|---|-----------|-----------|-----------|
| C | 16.207561 | 8.420557  | 17.140307 |
| C | 17.722406 | 8.375409  | 17.166694 |
| C | 18.187173 | 8.631750  | 15.793619 |
| C | 17.016394 | 8.867000  | 15.022038 |
| C | 15.808889 | 8.768337  | 15.766380 |
| C | 14.603421 | 9.008392  | 15.130422 |
| C | 14.620157 | 9.333255  | 13.748930 |
| C | 15.795424 | 9.407243  | 13.019390 |
| C | 17.050150 | 9.170068  | 13.645330 |
| C | 18.335132 | 9.205164  | 13.037063 |
| C | 19.474579 | 8.954383  | 13.783859 |
| C | 19.423649 | 8.669373  | 15.173221 |
| C | 14.140543 | 8.166616  | 18.277991 |
| C | 13.426384 | 7.044560  | 17.798344 |
| C | 12.028825 | 7.095502  | 17.868434 |
| C | 11.364435 | 8.198467  | 18.398241 |
| C | 12.095806 | 9.271262  | 18.900177 |
| C | 13.494280 | 9.273553  | 18.867926 |
| C | 14.104317 | 5.778039  | 17.277266 |
| C | 13.645094 | 5.404635  | 15.853883 |
| C | 13.882801 | 4.602931  | 18.252213 |
| C | 14.269166 | 10.444939 | 19.464505 |
| C | 14.011482 | 11.753696 | 18.691983 |
| C | 13.967120 | 10.606713 | 20.966896 |
| C | 19.734207 | 8.118208  | 18.395260 |

|    |           |           |           |
|----|-----------|-----------|-----------|
| C  | 20.448286 | 9.334585  | 18.484670 |
| C  | 21.843707 | 9.255618  | 18.570135 |
| C  | 22.504989 | 8.030346  | 18.582379 |
| C  | 21.771308 | 6.847878  | 18.542409 |
| C  | 20.374435 | 6.863151  | 18.466287 |
| C  | 19.768524 | 10.701021 | 18.555230 |
| C  | 19.980595 | 11.341656 | 19.942449 |
| C  | 20.234455 | 11.650126 | 17.433642 |
| C  | 19.594409 | 5.551573  | 18.470753 |
| C  | 19.855186 | 4.753375  | 19.762754 |
| C  | 19.886541 | 4.708740  | 17.213951 |
| Cl | 18.385969 | 8.196698  | 21.522392 |
| Cl | 15.342614 | 6.713954  | 21.106573 |
| Cu | 16.898265 | 7.790110  | 19.881873 |
| H  | 13.660905 | 8.945841  | 15.661334 |
| H  | 13.674173 | 9.522430  | 13.250356 |
| H  | 15.762246 | 9.649574  | 11.960345 |
| H  | 18.420017 | 9.429784  | 11.976983 |
| H  | 20.444549 | 8.982905  | 13.296464 |
| H  | 20.339420 | 8.493672  | 15.725161 |
| H  | 11.452215 | 6.246493  | 17.512614 |
| H  | 10.278628 | 8.212769  | 18.437173 |
| H  | 11.574866 | 10.118958 | 19.336117 |
| H  | 15.183458 | 5.955090  | 17.234039 |
| H  | 15.338807 | 10.224784 | 19.377767 |
| H  | 22.419826 | 10.173712 | 18.642497 |
| H  | 23.589294 | 7.997425  | 18.644985 |
| H  | 22.289163 | 5.893699  | 18.582416 |
| H  | 18.690175 | 10.557154 | 18.435203 |
| H  | 18.525889 | 5.792358  | 18.458336 |
| H  | 13.820143 | 6.218280  | 15.141399 |
| H  | 14.192741 | 4.522602  | 15.501751 |
| H  | 12.577319 | 5.158395  | 15.826462 |
| H  | 12.818732 | 4.349569  | 18.329544 |
| H  | 14.413890 | 3.711595  | 17.896061 |
| H  | 14.249479 | 4.854188  | 19.251543 |
| H  | 12.957617 | 12.050806 | 18.751227 |
| H  | 14.610745 | 12.569737 | 19.112505 |
| H  | 14.269750 | 11.653484 | 17.630941 |
| H  | 14.181957 | 9.679834  | 21.507609 |
| H  | 14.585756 | 11.405830 | 21.391861 |
| H  | 12.916633 | 10.870140 | 21.138799 |
| H  | 19.441319 | 12.294833 | 20.004162 |
| H  | 19.615251 | 10.680318 | 20.733254 |
| H  | 21.042143 | 11.546038 | 20.126193 |
| H  | 20.059903 | 11.223956 | 16.439547 |
| H  | 19.692002 | 12.600951 | 17.494565 |
| H  | 21.303581 | 11.877562 | 17.517895 |
| H  | 19.610078 | 5.353908  | 20.644257 |
| H  | 19.236343 | 3.848538  | 19.778896 |
| H  | 20.903974 | 4.442484  | 19.838330 |
| H  | 20.941748 | 4.414012  | 17.168514 |
| H  | 19.285346 | 3.791997  | 17.219470 |
| H  | 19.656098 | 5.261777  | 16.295436 |
| N  | 15.573917 | 8.177146  | 18.229227 |
| N  | 18.303880 | 8.137496  | 18.285395 |

(b)  $[\text{CuCl}_2(\text{Ar-BIAN})]^-$ : tetracoordinated Cu(I)

$[\text{CuCl}_2(\text{Ph-BIAN})]^-$

|   |            |           |           |
|---|------------|-----------|-----------|
| C | -14.868805 | 23.860799 | 41.258958 |
|---|------------|-----------|-----------|

|    |            |           |           |
|----|------------|-----------|-----------|
| C  | -15.212752 | 24.521905 | 39.975709 |
| C  | -13.983267 | 24.725275 | 39.290187 |
| C  | -12.851819 | 24.292367 | 40.035328 |
| C  | -13.372916 | 23.803829 | 41.336079 |
| C  | -16.381436 | 24.954262 | 39.374617 |
| C  | -16.310909 | 25.561639 | 38.092485 |
| C  | -15.116959 | 25.722859 | 37.412200 |
| C  | -13.895277 | 25.297871 | 38.004382 |
| C  | -12.594156 | 25.389733 | 37.436524 |
| C  | -11.495196 | 24.933889 | 38.142783 |
| C  | -11.601895 | 24.388543 | 39.450064 |
| C  | -16.955552 | 23.281567 | 42.268137 |
| C  | -17.625768 | 23.776607 | 43.400353 |
| C  | -19.012097 | 23.661271 | 43.483586 |
| C  | -19.741165 | 23.026242 | 42.473581 |
| C  | -19.067146 | 22.493566 | 41.371583 |
| C  | -17.682384 | 22.619078 | 41.263566 |
| H  | -17.034856 | 24.218241 | 44.199545 |
| H  | -20.820991 | 22.927260 | 42.554531 |
| H  | -17.152659 | 22.185118 | 40.420679 |
| C  | -11.446393 | 23.347421 | 42.673140 |
| C  | -10.649209 | 24.501296 | 42.575459 |
| C  | -9.294079  | 24.443453 | 42.899668 |
| C  | -8.718713  | 23.241365 | 43.319630 |
| C  | -9.519966  | 22.102027 | 43.440925 |
| C  | -10.880081 | 22.148640 | 43.140762 |
| H  | -11.104512 | 25.439378 | 42.272009 |
| H  | -7.661713  | 23.199209 | 43.571298 |
| H  | -11.530086 | 21.287963 | 43.280082 |
| Cl | -13.914868 | 20.373050 | 44.057456 |
| Cl | -14.809974 | 24.124325 | 45.666938 |
| Cu | -14.299859 | 22.671765 | 43.911398 |
| H  | -17.343824 | 24.828973 | 39.856389 |
| H  | -17.235158 | 25.898464 | 37.629420 |
| H  | -15.106323 | 26.176135 | 36.423413 |
| H  | -12.469089 | 25.818645 | 36.444726 |
| H  | -10.508273 | 25.004266 | 37.692030 |
| H  | -10.708116 | 24.068000 | 39.972023 |
| H  | -19.523649 | 24.053983 | 44.359010 |
| H  | -19.618539 | 21.968628 | 40.594587 |
| H  | -8.689321  | 25.345124 | 42.832115 |
| H  | -9.088420  | 21.168567 | 43.794088 |
| N  | -15.550926 | 23.367437 | 42.237195 |
| N  | -12.832334 | 23.378367 | 42.428089 |

[CuCl<sub>2</sub>(Mes-BIAN)]<sup>-</sup>

|   |            |           |           |
|---|------------|-----------|-----------|
| C | -14.878190 | 23.780202 | 41.352988 |
| C | -15.224051 | 24.353879 | 40.032239 |
| C | -13.992037 | 24.673475 | 39.399112 |
| C | -12.858254 | 24.355451 | 40.195554 |
| C | -13.381694 | 23.778153 | 41.455155 |
| C | -16.405051 | 24.614017 | 39.361823 |
| C | -16.337670 | 25.191856 | 38.065052 |
| C | -15.136642 | 25.502738 | 37.450906 |
| C | -13.904107 | 25.247144 | 38.115070 |
| C | -12.592591 | 25.506663 | 37.626967 |
| C | -11.486842 | 25.198532 | 38.400727 |
| C | -11.596907 | 24.619316 | 39.694076 |
| C | -16.994057 | 23.311982 | 42.302459 |
| C | -17.706881 | 24.404642 | 42.835354 |
| C | -19.103938 | 24.337490 | 42.844751 |
| C | -19.800712 | 23.225678 | 42.361273 |
| C | -19.056870 | 22.149699 | 41.866292 |

|    |            |           |           |
|----|------------|-----------|-----------|
| C  | -17.658715 | 22.161657 | 41.831863 |
| C  | -16.975450 | 25.600688 | 43.394987 |
| C  | -21.312788 | 23.191118 | 42.364072 |
| C  | -16.877529 | 20.973365 | 41.325214 |
| C  | -11.414772 | 23.296614 | 42.676672 |
| C  | -10.770821 | 24.391447 | 43.286997 |
| C  | -9.385739  | 24.321414 | 43.470017 |
| C  | -8.638078  | 23.203491 | 43.087340 |
| C  | -9.316454  | 22.128519 | 42.504195 |
| C  | -10.699599 | 22.142746 | 42.297655 |
| C  | -11.560915 | 25.595888 | 43.738376 |
| C  | -7.148171  | 23.139019 | 43.338762 |
| C  | -11.414130 | 20.956891 | 41.696025 |
| Cl | -14.338152 | 20.271921 | 44.075861 |
| Cl | -14.414149 | 24.109575 | 45.799314 |
| Cu | -14.312487 | 22.606722 | 44.012552 |
| H  | -17.367524 | 24.386179 | 39.805731 |
| H  | -17.268227 | 25.394941 | 37.540937 |
| H  | -15.130103 | 25.944114 | 36.456693 |
| H  | -12.463420 | 25.949295 | 36.641715 |
| H  | -10.493478 | 25.404764 | 38.010126 |
| H  | -10.703785 | 24.394131 | 40.265951 |
| H  | -19.659426 | 25.177586 | 43.259210 |
| H  | -19.575449 | 21.261586 | 41.507881 |
| H  | -8.882300  | 25.165728 | 43.938867 |
| H  | -8.758434  | 21.240772 | 42.209642 |
| H  | -16.424559 | 26.140967 | 42.612834 |
| H  | -17.680915 | 26.303939 | 43.850647 |
| H  | -16.243261 | 25.294153 | 44.154223 |
| H  | -21.689421 | 22.169206 | 42.488762 |
| H  | -21.725421 | 23.801469 | 43.175652 |
| H  | -21.733048 | 23.577125 | 41.423746 |
| H  | -16.150292 | 20.631897 | 42.074207 |
| H  | -17.552065 | 20.143896 | 41.086679 |
| H  | -16.314130 | 21.216950 | 40.413978 |
| H  | -12.379163 | 25.299422 | 44.408362 |
| H  | -10.913458 | 26.304305 | 44.266504 |
| H  | -12.013230 | 26.126860 | 42.889609 |
| H  | -6.922124  | 22.683149 | 44.313035 |
| H  | -6.637046  | 22.538413 | 42.576772 |
| H  | -6.696760  | 24.138246 | 43.338512 |
| H  | -10.718330 | 20.124039 | 41.547377 |
| H  | -12.233122 | 20.620234 | 42.345850 |
| H  | -11.855409 | 21.200814 | 40.719932 |
| N  | -15.573273 | 23.329702 | 42.337264 |
| N  | -12.827380 | 23.319473 | 42.521684 |

[CuCl<sub>2</sub>(Dipp-BIAN)]<sup>-</sup>

|   |           |          |           |
|---|-----------|----------|-----------|
| C | 16.212234 | 8.409307 | 17.231793 |
| C | 17.713177 | 8.384508 | 17.263165 |
| C | 18.182002 | 8.675982 | 15.887699 |
| C | 17.015614 | 8.865426 | 15.097664 |
| C | 15.811420 | 8.718346 | 15.838332 |
| C | 14.603825 | 8.877660 | 15.182002 |
| C | 14.617422 | 9.182031 | 13.793658 |
| C | 15.791779 | 9.324301 | 13.075365 |
| C | 17.049900 | 9.165897 | 13.720795 |
| C | 18.338730 | 9.277191 | 13.128320 |
| C | 19.476261 | 9.092259 | 13.894552 |
| C | 19.420939 | 8.789459 | 15.282143 |
| C | 14.132196 | 8.175593 | 18.327897 |
| C | 13.441662 | 6.962547 | 18.094243 |
| C | 12.042174 | 7.000482 | 18.077002 |

|    |           |           |           |
|----|-----------|-----------|-----------|
| C  | 11.341797 | 8.180909  | 18.314096 |
| C  | 12.044064 | 9.346091  | 18.613262 |
| C  | 13.443564 | 9.370026  | 18.646314 |
| C  | 14.176077 | 5.641326  | 17.872727 |
| C  | 14.060539 | 5.163726  | 16.410929 |
| C  | 13.694447 | 4.550568  | 18.846999 |
| C  | 14.182541 | 10.653689 | 19.019581 |
| C  | 14.086496 | 11.709509 | 17.900042 |
| C  | 13.692079 | 11.226695 | 20.361586 |
| C  | 19.736884 | 8.089703  | 18.446841 |
| C  | 20.447391 | 9.263193  | 18.794161 |
| C  | 21.845581 | 9.196107  | 18.822405 |
| C  | 22.523936 | 8.009255  | 18.554922 |
| C  | 21.798660 | 6.850704  | 18.286764 |
| C  | 20.399217 | 6.855929  | 18.242182 |
| C  | 19.732409 | 10.570007 | 19.132232 |
| C  | 20.183724 | 11.134671 | 20.491371 |
| C  | 19.907227 | 11.617549 | 18.014385 |
| C  | 19.635705 | 5.557795  | 17.985714 |
| C  | 20.040352 | 4.451907  | 18.977766 |
| C  | 19.801977 | 5.078116  | 16.529451 |
| Cl | 16.893183 | 9.627575  | 21.486059 |
| Cl | 16.848786 | 5.537482  | 20.605053 |
| Cu | 16.901845 | 7.795278  | 20.050688 |
| H  | 13.659064 | 8.774711  | 15.702991 |
| H  | 13.665588 | 9.306220  | 13.283599 |
| H  | 15.758086 | 9.557839  | 12.013546 |
| H  | 18.425059 | 9.508057  | 12.068891 |
| H  | 20.452311 | 9.180436  | 13.424318 |
| H  | 20.338658 | 8.651403  | 15.841897 |
| H  | 11.493815 | 6.082104  | 17.883246 |
| H  | 10.254356 | 8.186819  | 18.291957 |
| H  | 11.497092 | 10.258643 | 18.836087 |
| H  | 15.233112 | 5.799402  | 18.103073 |
| H  | 15.236197 | 10.404175 | 19.170983 |
| H  | 22.410345 | 10.091798 | 19.068198 |
| H  | 23.610970 | 7.981644  | 18.580391 |
| H  | 22.326729 | 5.915861  | 18.116471 |
| H  | 18.666339 | 10.352717 | 19.240285 |
| H  | 18.574720 | 5.747583  | 18.168792 |
| H  | 14.445717 | 5.910503  | 15.707407 |
| H  | 14.629990 | 4.237034  | 16.266542 |
| H  | 13.016044 | 4.958901  | 16.139524 |
| H  | 12.631934 | 4.310560  | 18.707034 |
| H  | 14.271128 | 3.631958  | 18.688049 |
| H  | 13.859442 | 4.863841  | 19.881110 |
| H  | 13.045387 | 12.014578 | 17.727498 |
| H  | 14.656642 | 12.606805 | 18.171433 |
| H  | 14.482785 | 11.330595 | 16.951147 |
| H  | 13.838423 | 10.498028 | 21.163204 |
| H  | 14.277120 | 12.117056 | 20.619258 |
| H  | 12.633323 | 11.516760 | 20.327024 |
| H  | 19.613523 | 12.041772 | 20.722539 |
| H  | 19.985290 | 10.413663 | 21.288690 |
| H  | 21.250561 | 11.395655 | 20.498590 |
| H  | 19.543294 | 11.245723 | 17.049874 |
| H  | 19.350750 | 12.531500 | 18.257083 |
| H  | 20.963135 | 11.892827 | 17.887910 |
| H  | 19.843296 | 4.770300  | 20.004654 |
| H  | 19.440787 | 3.552799  | 18.793925 |
| H  | 21.099234 | 4.176824  | 18.881469 |
| H  | 20.851131 | 4.843127  | 16.304458 |
| H  | 19.212819 | 4.168512  | 16.357986 |



|   |           |          |           |
|---|-----------|----------|-----------|
| H | 19.470373 | 5.836212 | 15.810919 |
| N | 15.556842 | 8.177317 | 18.315510 |
| N | 18.314451 | 8.135779 | 18.374436 |

(c) [CuCl(Ar-BIAN)]: tricoordinated Cu(I)

[CuCl(Ph-BIAN)]

|    |            |           |           |
|----|------------|-----------|-----------|
| C  | -14.886614 | 23.870098 | 41.197212 |
| C  | -15.215171 | 24.321909 | 39.828347 |
| C  | -13.972194 | 24.567907 | 39.183396 |
| C  | -12.840090 | 24.301453 | 40.002869 |
| C  | -13.374004 | 23.880668 | 41.312579 |
| C  | -16.385493 | 24.602515 | 39.144344 |
| C  | -16.303408 | 25.106986 | 37.821030 |
| C  | -15.092626 | 25.332416 | 37.190117 |
| C  | -13.871180 | 25.074521 | 37.870039 |
| C  | -12.558978 | 25.300145 | 37.372761 |
| C  | -11.456249 | 25.046841 | 38.170087 |
| C  | -11.576661 | 24.550491 | 39.492989 |
| C  | -16.952351 | 23.359891 | 42.319199 |
| C  | -17.622090 | 23.857326 | 43.450531 |
| C  | -18.992825 | 23.650620 | 43.589119 |
| C  | -19.699644 | 22.912196 | 42.636260 |
| C  | -19.023972 | 22.372887 | 41.537866 |
| C  | -17.658433 | 22.596157 | 41.372408 |
| H  | -17.054504 | 24.386954 | 44.210252 |
| H  | -20.764955 | 22.738691 | 42.759171 |
| H  | -17.127579 | 22.153050 | 40.535301 |
| C  | -11.466715 | 23.461956 | 42.705376 |
| C  | -10.903500 | 24.115733 | 43.812454 |
| C  | -9.553345  | 23.940776 | 44.108191 |
| C  | -8.764176  | 23.084694 | 43.335287 |
| C  | -9.335508  | 22.399996 | 42.259579 |
| C  | -10.679581 | 22.586900 | 41.939190 |
| H  | -11.534150 | 24.749630 | 44.428715 |
| H  | -7.716604  | 22.936642 | 43.581186 |
| H  | -11.131633 | 22.037575 | 41.118657 |
| Cl | -14.728416 | 24.190165 | 46.053308 |
| Cu | -14.230301 | 23.645021 | 44.001977 |
| H  | -17.357487 | 24.447035 | 39.596753 |
| H  | -17.226906 | 25.322154 | 37.291218 |
| H  | -15.070039 | 25.719020 | 36.174486 |
| H  | -12.426276 | 25.683975 | 36.364479 |
| H  | -10.461468 | 25.235487 | 37.776885 |
| H  | -10.683334 | 24.374655 | 40.079836 |
| H  | -19.505101 | 24.050714 | 44.459406 |
| H  | -19.559438 | 21.768222 | 40.810762 |
| H  | -9.122446  | 24.461547 | 44.958445 |
| H  | -8.736522  | 21.709823 | 41.671645 |
| N  | -15.559537 | 23.547765 | 42.246906 |
| N  | -12.851914 | 23.619331 | 42.465639 |

[CuCl(Mes-BIAN)]

|   |            |           |           |
|---|------------|-----------|-----------|
| C | -14.867602 | 23.796255 | 41.331167 |
| C | -15.242418 | 24.453409 | 40.068219 |
| C | -14.022638 | 24.829963 | 39.440854 |
| C | -12.867352 | 24.489998 | 40.192981 |
| C | -13.350960 | 23.815790 | 41.416735 |
| C | -16.439550 | 24.726043 | 39.428096 |
| C | -16.401209 | 25.373709 | 38.166087 |

|    |            |           |           |
|----|------------|-----------|-----------|
| C  | -15.212357 | 25.737465 | 37.555369 |
| C  | -13.965892 | 25.469106 | 38.185117 |
| C  | -12.668334 | 25.768864 | 37.685407 |
| C  | -11.541093 | 25.434411 | 38.416619 |
| C  | -11.618916 | 24.790975 | 39.680087 |
| C  | -16.982203 | 23.238574 | 42.255196 |
| C  | -17.686186 | 24.347051 | 42.760314 |
| C  | -19.083630 | 24.287703 | 42.771609 |
| C  | -19.785742 | 23.170845 | 42.307864 |
| C  | -19.047181 | 22.079746 | 41.837429 |
| C  | -17.649658 | 22.082753 | 41.808658 |
| C  | -16.958904 | 25.557837 | 43.295815 |
| C  | -21.296833 | 23.144023 | 42.307585 |
| C  | -16.879668 | 20.876230 | 41.329203 |
| C  | -11.383791 | 23.261362 | 42.634961 |
| C  | -10.715935 | 24.434974 | 43.040862 |
| C  | -9.343754  | 24.353898 | 43.304691 |
| C  | -8.629362  | 23.159144 | 43.185579 |
| C  | -9.332537  | 22.010001 | 42.805950 |
| C  | -10.704381 | 22.027355 | 42.549970 |
| C  | -11.451342 | 25.741264 | 43.237107 |
| C  | -7.152826  | 23.095410 | 43.500403 |
| C  | -11.445991 | 20.763108 | 42.191655 |
| Cl | -14.087896 | 20.981944 | 45.382006 |
| Cu | -14.539433 | 22.305605 | 43.724526 |
| H  | -17.392275 | 24.455861 | 39.868133 |
| H  | -17.340978 | 25.587474 | 37.665262 |
| H  | -15.228444 | 26.229935 | 36.586385 |
| H  | -12.565199 | 26.262210 | 36.722306 |
| H  | -10.559811 | 25.670683 | 38.015336 |
| H  | -10.711826 | 24.548873 | 40.222463 |
| H  | -19.635681 | 25.137777 | 43.167393 |
| H  | -19.570651 | 21.190039 | 41.493364 |
| H  | -8.824204  | 25.254444 | 43.626401 |
| H  | -8.802187  | 21.063388 | 42.722911 |
| H  | -16.432702 | 26.105970 | 42.503780 |
| H  | -17.660546 | 26.251631 | 43.767909 |
| H  | -16.208214 | 25.272249 | 44.042721 |
| H  | -21.679020 | 22.139308 | 42.518247 |
| H  | -21.709132 | 23.826089 | 43.058414 |
| H  | -21.703117 | 23.447151 | 41.332965 |
| H  | -16.207157 | 20.501802 | 42.112012 |
| H  | -17.561230 | 20.066540 | 41.052795 |
| H  | -16.257782 | 21.104819 | 40.454633 |
| H  | -12.356758 | 25.602603 | 43.839426 |
| H  | -10.812780 | 26.464406 | 43.753142 |
| H  | -11.759560 | 26.195337 | 42.286851 |
| H  | -6.975908  | 22.653006 | 44.489704 |
| H  | -6.612600  | 22.479586 | 42.772005 |
| H  | -6.699650  | 24.092284 | 43.502163 |
| H  | -10.764800 | 19.907032 | 42.174919 |
| H  | -12.234802 | 20.558080 | 42.926504 |
| H  | -11.924811 | 20.830892 | 41.206429 |
| N  | -15.548119 | 23.249180 | 42.278179 |
| N  | -12.786759 | 23.263400 | 42.422894 |

[CuCl(Dipp-BIAN)]

|   |           |          |           |
|---|-----------|----------|-----------|
| C | 16.222308 | 8.419163 | 17.121132 |
| C | 17.741800 | 8.401562 | 17.130819 |
| C | 18.178281 | 8.661134 | 15.743444 |
| C | 16.993955 | 8.815749 | 14.975716 |
| C | 15.798737 | 8.678576 | 15.735620 |
| C | 14.577417 | 8.805623 | 15.094843 |

|    |           |           |           |
|----|-----------|-----------|-----------|
| C  | 14.567639 | 9.069107  | 13.700391 |
| C  | 15.732498 | 9.206424  | 12.963250 |
| C  | 17.002474 | 9.082980  | 13.591003 |
| C  | 18.280327 | 9.201277  | 12.977311 |
| C  | 19.435403 | 9.057467  | 13.727402 |
| C  | 19.406718 | 8.784830  | 15.120981 |
| C  | 14.147299 | 8.221832  | 18.266107 |
| C  | 13.464456 | 6.992798  | 18.139191 |
| C  | 12.066575 | 7.014199  | 18.215220 |
| C  | 11.370103 | 8.201105  | 18.427013 |
| C  | 12.070869 | 9.394279  | 18.583865 |
| C  | 13.468798 | 9.434971  | 18.514581 |
| C  | 14.197123 | 5.665375  | 17.960137 |
| C  | 13.790725 | 4.949444  | 16.657602 |
| C  | 13.993229 | 4.754193  | 19.187281 |
| C  | 14.205821 | 10.750794 | 18.753619 |
| C  | 13.740173 | 11.866102 | 17.798499 |
| C  | 14.077352 | 11.186250 | 20.227937 |
| C  | 19.761370 | 8.124630  | 18.353979 |
| C  | 20.444003 | 9.242526  | 18.882824 |
| C  | 21.831855 | 9.150936  | 19.035134 |
| C  | 22.521906 | 7.986739  | 18.708316 |
| C  | 21.820586 | 6.880496  | 18.235525 |
| C  | 20.432946 | 6.916579  | 18.051746 |
| C  | 19.709842 | 10.514811 | 19.296937 |
| C  | 19.841150 | 10.764031 | 20.812242 |
| C  | 20.172670 | 11.736295 | 18.479164 |
| C  | 19.691631 | 5.653124  | 17.618590 |
| C  | 19.663310 | 4.626062  | 18.769657 |
| C  | 20.270179 | 5.032838  | 16.333120 |
| Cl | 17.210795 | 7.662157  | 21.967491 |
| Cu | 16.650355 | 7.950082  | 19.893787 |
| H  | 13.641726 | 8.710219  | 15.632943 |
| H  | 13.609058 | 9.167626  | 13.199363 |
| H  | 15.678932 | 9.410986  | 11.896981 |
| H  | 18.346307 | 9.407349  | 11.912078 |
| H  | 20.400274 | 9.154117  | 13.238165 |
| H  | 20.333510 | 8.675495  | 15.672478 |
| H  | 11.517673 | 6.081774  | 18.114864 |
| H  | 10.285060 | 8.194475  | 18.483549 |
| H  | 11.524328 | 10.314058 | 18.772020 |
| H  | 15.269271 | 5.873586  | 17.894455 |
| H  | 15.270657 | 10.586564 | 18.562960 |
| H  | 22.377542 | 10.004495 | 19.428323 |
| H  | 23.599376 | 7.934860  | 18.838814 |
| H  | 22.359098 | 5.963189  | 18.013950 |
| H  | 18.644286 | 10.370157 | 19.091813 |
| H  | 18.652060 | 5.919754  | 17.405816 |
| H  | 13.970404 | 5.581641  | 15.780520 |
| H  | 14.368579 | 4.025866  | 16.535281 |
| H  | 12.728953 | 4.676268  | 16.661500 |
| H  | 12.936749 | 4.493037  | 19.320489 |
| H  | 14.557055 | 3.821605  | 19.066748 |
| H  | 14.339096 | 5.244323  | 20.103574 |
| H  | 12.687010 | 12.124465 | 17.958858 |
| H  | 14.329810 | 12.775610 | 17.962416 |
| H  | 13.856927 | 11.570255 | 16.749677 |
| H  | 14.466613 | 10.415970 | 20.902319 |
| H  | 14.642411 | 12.109404 | 20.403678 |
| H  | 13.031362 | 11.375477 | 20.497067 |
| H  | 19.289736 | 11.668750 | 21.096174 |
| H  | 19.432149 | 9.923300  | 21.381939 |
| H  | 20.888213 | 10.905318 | 21.106155 |

|   |           |           |           |
|---|-----------|-----------|-----------|
| H | 20.043838 | 11.570792 | 17.402882 |
| H | 19.594496 | 12.625014 | 18.758942 |
| H | 21.230976 | 11.961430 | 18.657026 |
| H | 19.200211 | 5.051468  | 19.666219 |
| H | 19.093465 | 3.735809  | 18.476119 |
| H | 20.677156 | 4.304274  | 19.035551 |
| H | 21.299378 | 4.684103  | 16.476155 |
| H | 19.671536 | 4.166078  | 16.028832 |
| H | 20.270983 | 5.751409  | 15.505650 |
| N | 15.585282 | 8.220665  | 18.222656 |
| N | 18.342946 | 8.193411  | 18.238414 |

(d) [Cu<sub>2</sub>Cl<sub>2</sub> (Ar-BIAN)<sub>2</sub>]: binuclear Cu(I)

[Cu<sub>2</sub>Cl<sub>2</sub>(Ph-BIAN)<sub>2</sub>]

|    |            |           |           |
|----|------------|-----------|-----------|
| C  | -14.976083 | 23.112158 | 41.334645 |
| C  | -15.135323 | 23.484164 | 39.911682 |
| C  | -13.846950 | 23.881810 | 39.460605 |
| C  | -12.837994 | 23.774995 | 40.456754 |
| C  | -13.504272 | 23.231103 | 41.660771 |
| C  | -16.186646 | 23.495785 | 39.011806 |
| C  | -15.944734 | 23.922675 | 37.680229 |
| C  | -14.697692 | 24.344929 | 37.253750 |
| C  | -13.593911 | 24.338600 | 38.149694 |
| C  | -12.261938 | 24.744386 | 37.863046 |
| C  | -11.286510 | 24.677884 | 38.842539 |
| C  | -11.553505 | 24.186454 | 40.146791 |
| C  | -17.176770 | 22.628113 | 42.144296 |
| C  | -17.960191 | 23.724716 | 41.750120 |
| C  | -19.349581 | 23.608548 | 41.714099 |
| C  | -19.967195 | 22.404741 | 42.062484 |
| C  | -19.186064 | 21.322093 | 42.475974 |
| C  | -17.798161 | 21.432950 | 42.539765 |
| H  | -17.478378 | 24.664819 | 41.498478 |
| H  | -21.049720 | 22.317648 | 42.030512 |
| H  | -17.182882 | 20.615779 | 42.904055 |
| C  | -11.775406 | 22.851430 | 43.276348 |
| C  | -11.469836 | 23.447775 | 44.510375 |
| C  | -10.166407 | 23.392384 | 45.000664 |
| C  | -9.170062  | 22.712008 | 44.295156 |
| C  | -9.486452  | 22.079653 | 43.090099 |
| C  | -10.781329 | 22.148105 | 42.576612 |
| H  | -12.264193 | 23.931237 | 45.071263 |
| H  | -8.159305  | 22.658882 | 44.690204 |
| H  | -11.034809 | 21.639594 | 41.651244 |
| H  | -17.185923 | 23.196364 | 39.304194 |
| H  | -16.775183 | 23.927354 | 36.979791 |
| H  | -14.556184 | 24.682278 | 36.230025 |
| H  | -12.014023 | 25.109481 | 36.869526 |
| H  | -10.275689 | 24.999723 | 38.608166 |
| H  | -10.750695 | 24.132603 | 40.872320 |
| H  | -19.950018 | 24.465131 | 41.418760 |
| H  | -19.659067 | 20.389745 | 42.771689 |
| H  | -9.935256  | 23.865987 | 45.950689 |
| H  | -8.725424  | 21.523713 | 42.548541 |
| N  | -15.772156 | 22.718384 | 42.268376 |
| N  | -13.118231 | 22.884256 | 42.840288 |
| Cu | -14.752276 | 22.277798 | 44.102515 |
| Cl | -14.985513 | 23.601603 | 46.093509 |
| Cl | -15.045048 | 20.038534 | 44.912036 |
| Cu | -15.229348 | 21.359678 | 46.910147 |

|   |            |           |           |
|---|------------|-----------|-----------|
| N | -16.787356 | 21.068246 | 48.352201 |
| N | -14.125450 | 20.551738 | 48.571846 |
| C | -16.136115 | 19.169519 | 52.858903 |
| C | -17.446151 | 19.305661 | 53.393978 |
| C | -18.449832 | 19.889851 | 52.641214 |
| C | -18.234542 | 20.348816 | 51.315793 |
| C | -16.972461 | 20.224446 | 50.761477 |
| C | -15.933706 | 19.659680 | 51.551328 |
| C | -14.671835 | 19.634258 | 50.896838 |
| C | -13.596793 | 19.056876 | 51.549662 |
| C | -13.788361 | 18.530924 | 52.853728 |
| C | -15.008945 | 18.590391 | 53.503278 |
| C | -16.357490 | 20.573825 | 49.462020 |
| C | -14.882167 | 20.261561 | 49.573562 |
| C | -18.142335 | 21.343870 | 48.062311 |
| C | -19.777112 | 22.901627 | 47.193434 |
| C | -20.779754 | 21.937698 | 47.330678 |
| C | -18.458547 | 22.605989 | 47.534750 |
| C | -20.454282 | 20.666434 | 47.810264 |
| C | -19.143208 | 20.365852 | 48.178834 |
| C | -12.721338 | 20.396810 | 48.553139 |
| C | -11.897042 | 20.981899 | 49.527962 |
| C | -10.510914 | 20.864870 | 49.427298 |
| C | -9.936550  | 20.163174 | 48.364395 |
| C | -10.758543 | 19.601087 | 47.383722 |
| C | -12.144139 | 19.731652 | 47.459743 |
| H | -19.058589 | 20.777472 | 50.758127 |
| H | -19.443204 | 19.992418 | 53.068966 |
| H | -17.655051 | 18.949335 | 54.399587 |
| H | -15.111818 | 18.192319 | 54.509665 |
| H | -12.939605 | 18.078033 | 53.358473 |
| H | -12.616255 | 19.006882 | 51.091616 |
| H | -17.661856 | 23.328936 | 47.387519 |
| H | -20.016206 | 23.884995 | 46.798158 |
| H | -21.802976 | 22.168541 | 47.047500 |
| H | -21.221440 | 19.900826 | 47.892611 |
| H | -18.883961 | 19.372660 | 48.533182 |
| H | -12.345362 | 21.542234 | 50.343057 |
| H | -9.879314  | 21.329549 | 50.180083 |
| H | -8.856395  | 20.071276 | 48.291452 |
| H | -10.319980 | 19.074274 | 46.540831 |
| H | -12.791613 | 19.339797 | 46.681105 |

[Cu<sub>2</sub>Cl<sub>2</sub>(Mes-BIAN)<sub>2</sub>]

|   |            |           |           |
|---|------------|-----------|-----------|
| C | -14.950337 | 23.259690 | 41.454469 |
| C | -15.160278 | 23.754676 | 40.079817 |
| C | -13.865590 | 23.937171 | 39.522129 |
| C | -12.811299 | 23.605390 | 40.416023 |
| C | -13.456743 | 23.167368 | 41.669422 |
| C | -16.271170 | 24.042828 | 39.308147 |
| C | -16.071975 | 24.511546 | 37.982379 |
| C | -14.810145 | 24.688347 | 37.439864 |
| C | -13.648301 | 24.400897 | 38.208880 |
| C | -12.291544 | 24.528532 | 37.800390 |
| C | -11.263574 | 24.205987 | 38.670459 |
| C | -11.502253 | 23.739661 | 39.990523 |
| C | -17.154365 | 22.987195 | 42.283557 |
| C | -17.825293 | 24.162180 | 42.671931 |
| C | -19.220826 | 24.181479 | 42.582897 |
| C | -19.954935 | 23.075376 | 42.143304 |
| C | -19.251866 | 21.920612 | 41.785476 |
| C | -17.857343 | 21.844968 | 41.855950 |
| C | -17.059832 | 25.359472 | 43.183134 |

|    |            |           |           |
|----|------------|-----------|-----------|
| C  | -21.465551 | 23.110819 | 42.100267 |
| C  | -17.126144 | 20.573501 | 41.496237 |
| C  | -11.624023 | 22.650714 | 43.081130 |
| C  | -10.956313 | 23.736430 | 43.678426 |
| C  | -9.600113  | 23.585796 | 43.983669 |
| C  | -8.907952  | 22.396330 | 43.734453 |
| C  | -9.613028  | 21.333924 | 43.159862 |
| C  | -10.969675 | 21.429173 | 42.833709 |
| C  | -11.690365 | 25.018416 | 43.991092 |
| C  | -7.453131  | 22.248038 | 44.117279 |
| C  | -11.716278 | 20.254023 | 42.248766 |
| H  | -17.276404 | 23.917817 | 39.694532 |
| H  | -16.945008 | 24.737650 | 37.376695 |
| H  | -14.702699 | 25.049141 | 36.419941 |
| H  | -12.064116 | 24.881669 | 36.797626 |
| H  | -10.235103 | 24.311100 | 38.336768 |
| H  | -10.668442 | 23.497195 | 40.639634 |
| H  | -19.746271 | 25.087888 | 42.877871 |
| H  | -19.802131 | 21.043041 | 41.450974 |
| H  | -9.075841  | 24.422888 | 44.441069 |
| H  | -9.098603  | 20.394198 | 42.967367 |
| N  | -15.734511 | 22.921666 | 42.413754 |
| N  | -13.020277 | 22.761597 | 42.807077 |
| Cu | -14.635705 | 22.285109 | 44.151006 |
| Cl | -14.860752 | 23.601591 | 46.156104 |
| Cl | -14.867203 | 20.018517 | 44.903361 |
| Cu | -15.106260 | 21.335685 | 46.906317 |
| N  | -16.738545 | 20.865543 | 48.232117 |
| N  | -14.029577 | 20.691689 | 48.654617 |
| C  | -16.168721 | 19.214658 | 52.833647 |
| C  | -17.530464 | 19.092620 | 53.226984 |
| C  | -18.547312 | 19.421938 | 52.346449 |
| C  | -18.291916 | 19.889921 | 51.030116 |
| C  | -16.977668 | 20.018709 | 50.619230 |
| C  | -15.934802 | 19.679972 | 51.523832 |
| C  | -14.633229 | 19.857043 | 50.980560 |
| C  | -13.532302 | 19.562022 | 51.763888 |
| C  | -13.748286 | 19.091845 | 53.086518 |
| C  | -15.016815 | 18.920063 | 53.614807 |
| C  | -16.316539 | 20.455936 | 49.373798 |
| C  | -14.825826 | 20.355771 | 49.604680 |
| C  | -18.130992 | 20.983145 | 47.941936 |
| C  | -20.133892 | 22.310522 | 47.838081 |
| C  | -20.836929 | 21.252123 | 47.253498 |
| C  | -18.782237 | 22.207950 | 48.181840 |
| C  | -20.147980 | 20.059125 | 47.012936 |
| C  | -18.796601 | 19.901214 | 47.335647 |
| C  | -12.611697 | 20.616625 | 48.800077 |
| C  | -11.905514 | 21.755318 | 49.231846 |
| C  | -10.512603 | 21.669657 | 49.319787 |
| C  | -9.813736  | 20.508392 | 48.974768 |
| C  | -10.550560 | 19.406404 | 48.529522 |
| C  | -11.944819 | 19.435536 | 48.423576 |
| C  | -18.037083 | 23.378736 | 48.777291 |
| C  | -22.285502 | 21.408907 | 46.850869 |
| C  | -18.065300 | 18.615598 | 47.031536 |
| C  | -12.631818 | 23.033271 | 49.578131 |
| C  | -8.304110  | 20.461734 | 49.037915 |
| C  | -12.712600 | 18.241996 | 47.907023 |
| H  | -19.117381 | 20.137786 | 50.372441 |
| H  | -19.579868 | 19.321055 | 52.668628 |
| H  | -17.770505 | 18.738429 | 54.226432 |
| H  | -15.137229 | 18.557771 | 54.632746 |

|   |            |           |           |
|---|------------|-----------|-----------|
| H | -12.883021 | 18.860412 | 53.701265 |
| H | -12.522212 | 19.682652 | 51.388944 |
| H | -20.645823 | 23.252886 | 48.024277 |
| H | -20.670638 | 19.225050 | 46.548260 |
| H | -9.960068  | 22.544285 | 49.658254 |
| H | -10.028246 | 18.495221 | 48.243859 |
| H | -17.747385 | 26.147820 | 43.504622 |
| H | -16.402355 | 25.785613 | 42.413811 |
| H | -16.426601 | 25.085407 | 44.035708 |
| H | -21.839376 | 24.124560 | 41.918514 |
| H | -21.899430 | 22.771354 | 43.051108 |
| H | -21.861207 | 22.458396 | 41.313914 |
| H | -17.835743 | 19.775799 | 41.255859 |
| H | -16.495365 | 20.234615 | 42.327056 |
| H | -16.471130 | 20.708759 | 40.625393 |
| H | -12.572088 | 24.822913 | 44.613602 |
| H | -12.040764 | 25.523025 | 43.080918 |
| H | -11.038649 | 25.715759 | 44.526439 |
| H | -6.935807  | 21.536382 | 43.464295 |
| H | -7.347593  | 21.878862 | 45.146793 |
| H | -6.922806  | 23.205232 | 44.061682 |
| H | -11.067567 | 19.374441 | 42.192889 |
| H | -12.081225 | 20.463007 | 41.234502 |
| H | -12.589620 | 19.999573 | 42.861816 |
| H | -18.682045 | 24.261490 | 48.826133 |
| H | -17.154943 | 23.629462 | 48.175399 |
| H | -17.685792 | 23.166779 | 49.795754 |
| H | -22.817601 | 20.451666 | 46.882094 |
| H | -22.374482 | 21.795747 | 45.826185 |
| H | -22.812219 | 22.110316 | 47.507506 |
| H | -18.713590 | 17.922217 | 46.486957 |
| H | -17.729678 | 18.108324 | 47.945792 |
| H | -17.174466 | 18.806988 | 46.420841 |
| H | -13.250689 | 23.373152 | 48.738797 |
| H | -11.919459 | 23.826994 | 49.823481 |
| H | -13.297777 | 22.906045 | 50.441865 |
| H | -7.940190  | 19.443849 | 49.216384 |
| H | -7.914655  | 21.104736 | 49.835098 |
| H | -7.854795  | 20.805939 | 48.096125 |
| H | -12.026725 | 17.448954 | 47.593602 |
| H | -13.335812 | 18.518236 | 47.047813 |
| H | -13.379988 | 17.821083 | 48.670680 |

[Cu<sub>2</sub>Cl<sub>2</sub>(Dipp-BIAN)<sub>2</sub>]

|   |           |           |           |
|---|-----------|-----------|-----------|
| C | 16.229592 | 8.513604  | 17.227597 |
| C | 17.717760 | 8.247253  | 17.251387 |
| C | 18.215616 | 8.448342  | 15.875225 |
| C | 17.084567 | 8.805824  | 15.092250 |
| C | 15.875060 | 8.861850  | 15.836062 |
| C | 14.698698 | 9.176212  | 15.178465 |
| C | 14.748844 | 9.442465  | 13.784398 |
| C | 15.931092 | 9.404190  | 13.064987 |
| C | 17.156043 | 9.080259  | 13.710955 |
| C | 18.445457 | 9.004231  | 13.115635 |
| C | 19.551410 | 8.673925  | 13.880167 |
| C | 19.457788 | 8.388195  | 15.268120 |
| C | 14.164080 | 8.677491  | 18.385547 |
| C | 13.256002 | 7.592561  | 18.421582 |
| C | 11.889580 | 7.884038  | 18.490990 |
| C | 11.431538 | 9.197971  | 18.560391 |
| C | 12.346749 | 10.246280 | 18.580675 |
| C | 13.726999 | 10.018437 | 18.500898 |

|    |           |           |           |
|----|-----------|-----------|-----------|
| C  | 13.748545 | 6.149556  | 18.351519 |
| C  | 13.711236 | 5.615896  | 16.904102 |
| C  | 12.983246 | 5.206464  | 19.295583 |
| C  | 14.686525 | 11.205285 | 18.586276 |
| C  | 14.479248 | 12.207659 | 17.433042 |
| C  | 14.570547 | 11.914752 | 19.950408 |
| C  | 19.665239 | 7.626596  | 18.460566 |
| C  | 20.535180 | 8.603455  | 19.000984 |
| C  | 21.894612 | 8.288270  | 19.096670 |
| C  | 22.378024 | 7.040580  | 18.708164 |
| C  | 21.494507 | 6.077116  | 18.230480 |
| C  | 20.124059 | 6.338019  | 18.098474 |
| C  | 20.012985 | 9.971317  | 19.432173 |
| C  | 20.668502 | 10.488570 | 20.724168 |
| C  | 20.162483 | 11.008039 | 18.298956 |
| C  | 19.192830 | 5.223394  | 17.622553 |
| C  | 19.164739 | 4.057366  | 18.631025 |
| C  | 19.559946 | 4.717884  | 16.213093 |
| H  | 13.752255 | 9.227319  | 15.704070 |
| H  | 13.823669 | 9.689176  | 13.271399 |
| H  | 15.927303 | 9.621753  | 11.999867 |
| H  | 18.559361 | 9.209186  | 12.054097 |
| H  | 20.527926 | 8.625323  | 13.406836 |
| H  | 20.348692 | 8.125443  | 15.826404 |
| H  | 11.173413 | 7.067953  | 18.500629 |
| H  | 10.365569 | 9.402421  | 18.616888 |
| H  | 11.987042 | 11.268024 | 18.668321 |
| H  | 14.792602 | 6.144061  | 18.681991 |
| H  | 15.709994 | 10.826005 | 18.515549 |
| H  | 22.584173 | 9.028319  | 19.491318 |
| H  | 23.437673 | 6.814685  | 18.794206 |
| H  | 21.871404 | 5.094759  | 17.958273 |
| H  | 18.944323 | 9.860628  | 19.645579 |
| H  | 18.175135 | 5.621231  | 17.575709 |
| H  | 14.297819 | 6.243538  | 16.223892 |
| H  | 14.115987 | 4.597475  | 16.859798 |
| H  | 12.682125 | 5.586046  | 16.523850 |
| H  | 11.939852 | 5.066761  | 18.986769 |
| H  | 13.458884 | 4.219356  | 19.294988 |
| H  | 12.989985 | 5.580718  | 20.324095 |
| H  | 13.480752 | 12.659901 | 17.470061 |
| H  | 15.211457 | 13.020888 | 17.503645 |
| H  | 14.595713 | 11.731647 | 16.453722 |
| H  | 14.791597 | 11.225150 | 20.769793 |
| H  | 15.285235 | 12.745250 | 20.004454 |
| H  | 13.566014 | 12.328884 | 20.100994 |
| H  | 20.162459 | 11.403657 | 21.051363 |
| H  | 20.591133 | 9.755565  | 21.533067 |
| H  | 21.728255 | 10.734081 | 20.581973 |
| H  | 19.652828 | 10.688043 | 17.383420 |
| H  | 19.739308 | 11.973152 | 18.603096 |
| H  | 21.220134 | 11.166509 | 18.052363 |
| H  | 18.826913 | 4.399636  | 19.613224 |
| H  | 18.472037 | 3.279480  | 18.287038 |
| H  | 20.155316 | 3.598532  | 18.739273 |
| H  | 20.559510 | 4.267010  | 16.195827 |
| H  | 18.847280 | 3.949613  | 15.890058 |
| H  | 19.543974 | 5.525967  | 15.474031 |
| N  | 15.560993 | 8.383781  | 18.317834 |
| N  | 18.273779 | 7.942145  | 18.370474 |
| Cl | 16.697623 | 9.317340  | 21.852197 |
| Cl | 16.770980 | 5.727222  | 21.136081 |
| Cu | 16.854805 | 7.829209  | 19.978826 |



|    |           |           |           |
|----|-----------|-----------|-----------|
| Cu | 16.638818 | 7.221314  | 23.007529 |
| N  | 17.964346 | 7.120543  | 24.740557 |
| N  | 15.253700 | 6.695217  | 24.553608 |
| C  | 17.309356 | 6.826552  | 25.806862 |
| C  | 15.822936 | 6.572212  | 25.700508 |
| C  | 15.341294 | 6.241358  | 27.056947 |
| C  | 16.479884 | 6.294179  | 27.906018 |
| C  | 17.679487 | 6.634509  | 27.224545 |
| C  | 18.862704 | 6.691524  | 27.939352 |
| C  | 18.829265 | 6.419750  | 29.332886 |
| C  | 17.656560 | 6.105265  | 29.998309 |
| C  | 16.424982 | 6.032542  | 29.290619 |
| C  | 15.144217 | 5.723492  | 29.826413 |
| C  | 14.031236 | 5.686208  | 29.003706 |
| C  | 14.108291 | 5.940098  | 27.608470 |
| C  | 19.359241 | 7.428183  | 24.769436 |
| C  | 20.265093 | 6.448295  | 24.296776 |
| C  | 21.629560 | 6.755134  | 24.312461 |
| C  | 22.087562 | 7.998639  | 24.742939 |
| C  | 21.173890 | 8.965621  | 25.151637 |
| C  | 19.795700 | 8.712667  | 25.172276 |
| C  | 19.769963 | 5.086904  | 23.817152 |
| C  | 19.796971 | 4.048417  | 24.958182 |
| C  | 20.538385 | 4.561870  | 22.592385 |
| C  | 18.836594 | 9.833638  | 25.572024 |
| C  | 19.106450 | 10.355108 | 26.997583 |
| C  | 18.883040 | 10.988901 | 24.551427 |
| C  | 13.860466 | 6.424324  | 24.375313 |
| C  | 12.968832 | 7.519550  | 24.300186 |
| C  | 11.608284 | 7.244619  | 24.123262 |
| C  | 11.144110 | 5.938304  | 23.987951 |
| C  | 12.048592 | 4.880221  | 24.010186 |
| C  | 13.420925 | 5.091479  | 24.196542 |
| C  | 13.458585 | 8.959005  | 24.436445 |
| C  | 12.871736 | 9.886476  | 23.357467 |
| C  | 13.175606 | 9.514519  | 25.847622 |
| C  | 14.375721 | 3.898664  | 24.164874 |
| C  | 14.350320 | 3.199574  | 22.790889 |
| C  | 14.082484 | 2.891170  | 25.294858 |
| H  | 19.801752 | 6.941405  | 27.459627 |
| H  | 19.759761 | 6.466145  | 29.891482 |
| H  | 17.673228 | 5.910375  | 31.067686 |
| H  | 15.042732 | 5.516189  | 30.888747 |
| H  | 13.061917 | 5.450304  | 29.433533 |
| H  | 13.212598 | 5.890571  | 27.000271 |
| H  | 22.343950 | 6.012247  | 23.971048 |
| H  | 23.151952 | 8.218571  | 24.742826 |
| H  | 21.533188 | 9.945075  | 25.455879 |
| H  | 18.728079 | 5.211544  | 23.503239 |
| H  | 17.816954 | 9.438300  | 25.553733 |
| H  | 10.902750 | 8.069442  | 24.083003 |
| H  | 10.083238 | 5.747067  | 23.849242 |
| H  | 11.686552 | 3.864539  | 23.874397 |
| H  | 14.543134 | 8.955400  | 24.288581 |
| H  | 15.394250 | 4.270932  | 24.307773 |
| H  | 19.207922 | 4.376408  | 25.821853 |
| H  | 19.389925 | 3.089666  | 24.614511 |
| H  | 20.823905 | 3.874072  | 25.303879 |
| H  | 21.573547 | 4.291841  | 22.836198 |
| H  | 20.047403 | 3.660349  | 22.209447 |
| H  | 20.557033 | 5.300972  | 21.785363 |
| H  | 20.100213 | 10.812003 | 27.076952 |
| H  | 18.370143 | 11.122859 | 27.263822 |

|   |           |           |           |
|---|-----------|-----------|-----------|
| H | 19.044629 | 9.554834  | 27.742716 |
| H | 18.610619 | 10.638813 | 23.551696 |
| H | 18.174467 | 11.775110 | 24.839844 |
| H | 19.882324 | 11.439265 | 24.506129 |
| H | 13.328650 | 10.879562 | 23.434626 |
| H | 13.074136 | 9.502472  | 22.353085 |
| H | 11.787594 | 10.013296 | 23.466616 |
| H | 13.635871 | 8.897029  | 26.627356 |
| H | 13.568926 | 10.533690 | 25.945624 |
| H | 12.096882 | 9.550285  | 26.045992 |
| H | 14.638021 | 3.892117  | 21.994905 |
| H | 15.059217 | 2.362597  | 22.782067 |
| H | 13.355626 | 2.796441  | 22.564216 |
| H | 13.083366 | 2.451293  | 25.188801 |
| H | 14.808783 | 2.070052  | 25.267981 |
| H | 14.138431 | 3.360436  | 26.282906 |
